# Supplementary material for: Matrix Stiffness Triggers Lipid Metabolic Cross-talk between Tumor and Stromal Cells to Mediate Bevacizumab Resistance in Colorectal Cancer Liver Metastases
Source: PubMed Central journal article supplement — Cancer Res. 2023 Aug 23;83(21):3577–92. doi: 10.1158/0008-5472.CAN-23-0025 (PMC10618741; doi:10.1158/0008-5472.can-23-0025), 2023-08-23
Supplement: can-23-0025_figure_s2_suppsf2.pdf [file can-23-0025_figure_s2_suppsf2.pdf]

Supplementary Fig. S2

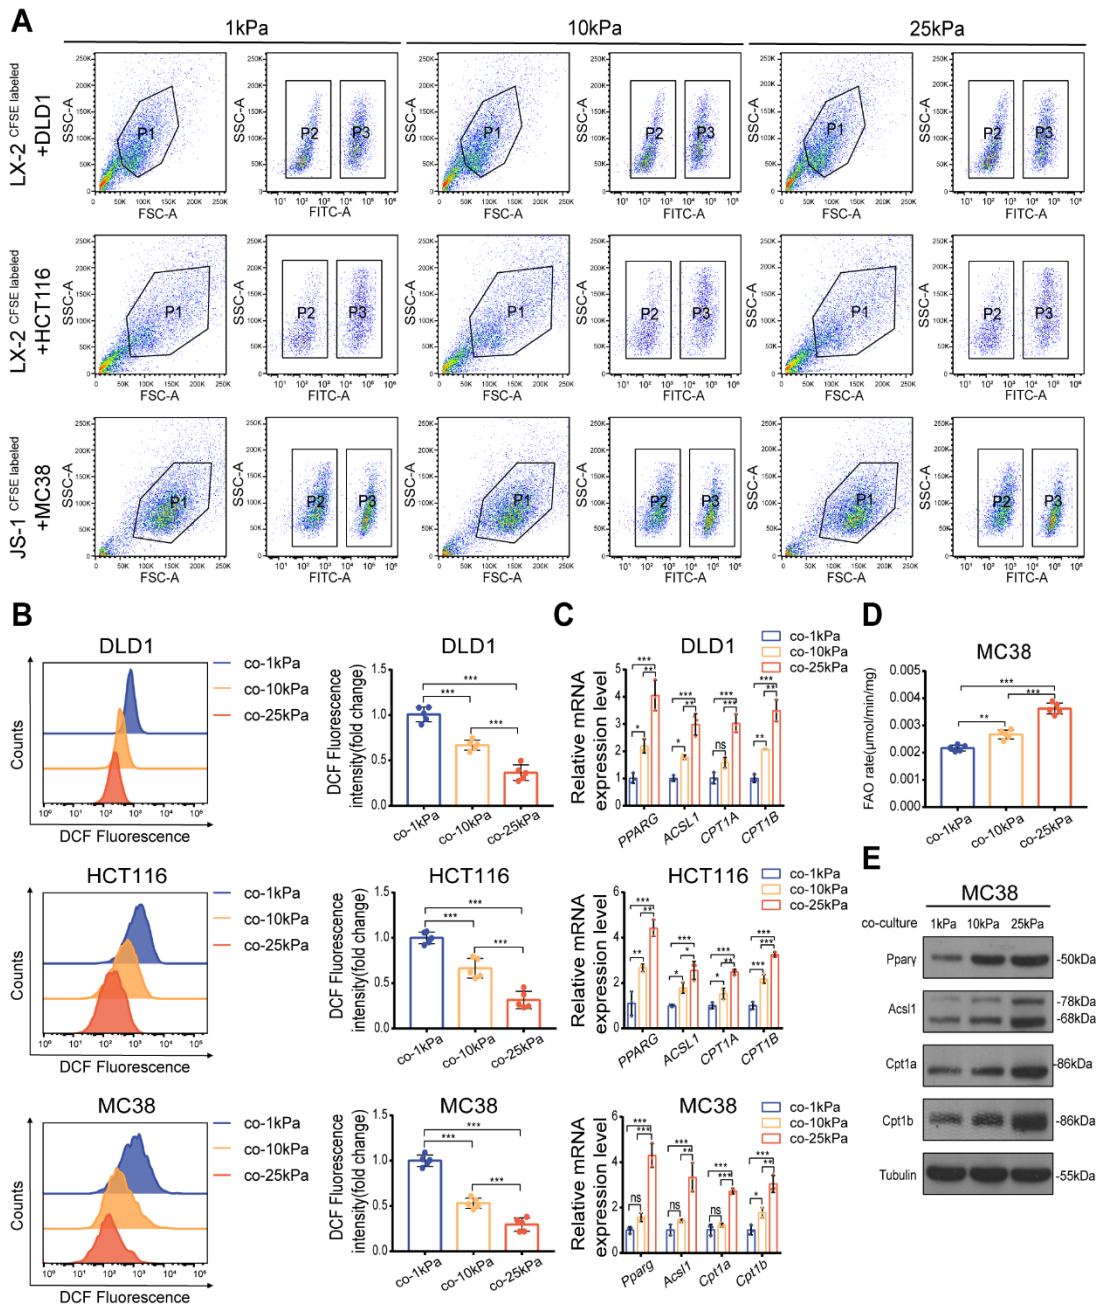

**Supplementary Figure.S2 HSCs are essential for matrix stiffness-mediated FAO metabolic reprogramming in colon cancer cells. (A)** DLD1 cells or HCT116 cells were mixed co-cultured with CFSE labelled LX-2 cells, MC38 cells were mixed co-cultured with CFSE labelled JS-1 cells on indicated substrates for 48 h. Colon cancer cells and HSCs in co-culture system were separated through flow cytometry. The left panel shows that colon cancer cells and HSCs are found in population 1 (P1), and the separated colon cancer cells (population 2; P2) and HSCs (population 3; P3) were detected with FITC signals. **(B)** ROS content in DLD1, HCT116 and MC38 cells co-cultured with HSCs on 1kPa,10kPa and 25kPa polyacrylamide hydrogels (one-way ANOVA, n=5 independent experiments). **(C)** Relative mRNA levels of FAO related genes in DLD1, HCT116 and MC38 cells co-cultured with HSCs on 1kPa,10kPa

and 25kPa polyacrylamide hydrogels (one-way ANOVA, n=3 independent experiments). **(D, E)** Fatty acid oxidation rate **(D)** and protein levels of FAO related genes **(E)** in MC38 cells co-cultured with JS-1 cells on 1kPa,10kPa and 25kPa polyacrylamide hydrogels (one-way ANOVA, n=5 independent experiments). Data are graphed as the mean  $\pm$  SD. ns, not significant,  $P > 0.05$ ;  $*P < 0.05$ ;  $**P < 0.01$ ;  $***P < 0.001$ .
