# Supplementary material for: Matrix Stiffness Triggers Lipid Metabolic Cross-talk between Tumor and Stromal Cells to Mediate Bevacizumab Resistance in Colorectal Cancer Liver Metastases
Source: PubMed Central journal article supplement — Cancer Res. 2023 Aug 23;83(21):3577–92. doi: 10.1158/0008-5472.CAN-23-0025 (PMC10618741; doi:10.1158/0008-5472.can-23-0025), 2023-08-23
Supplement: can-23-0025_figure_s3_suppsf3.pdf [file can-23-0025_figure_s3_suppsf3.pdf]

Supplementary Fig. S3

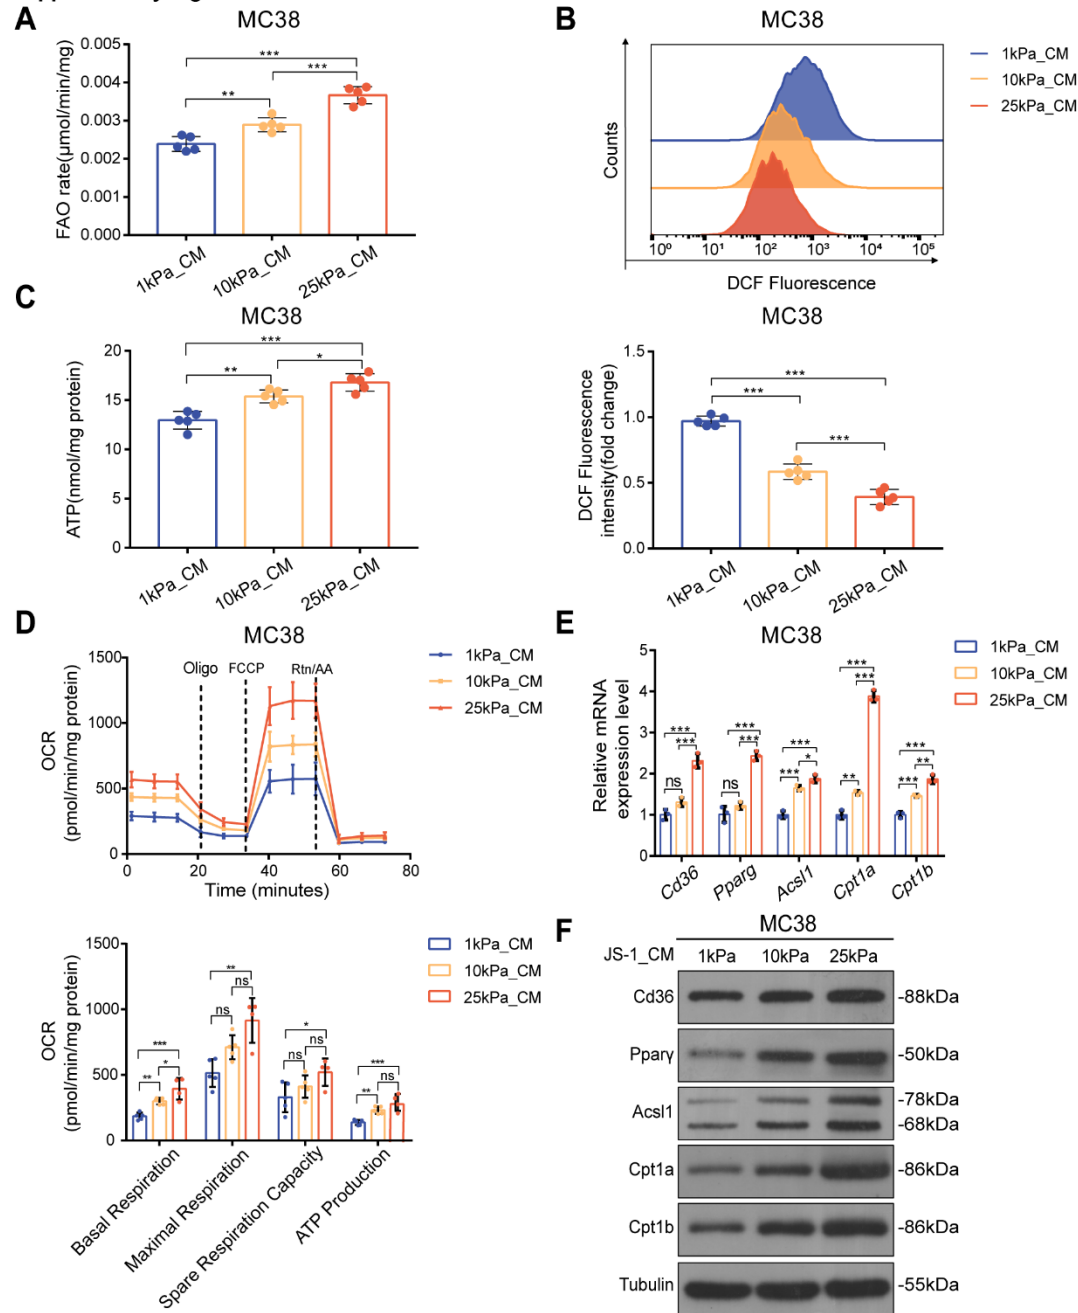

**Supplementary Figure. S3 Conditioned medium derived from HSCs cultured on the stiff substrates upregulates FAO metabolism in colon cancer cells. (A–C)** Fatty acid oxidation rate (A), ROS content (B) and ATP level (C) of MC38 cells treated with conditioned medium from JS-1 cells cultured on 1kPa, 10kPa and 25kPa polyacrylamide hydrogels for 48 h (one-way ANOVA,  $n=5$  independent experiments). **(D)** The basal respiration, maximal respiration, spare respiration capacity and ATP production of MC38 cells with indicated treatment were measured by OCR measurements through Seahorse XF96 analysis (one-way ANOVA,  $n=5$  independent experiments). **(E, F)** Relative expression of Cd36, Pparg, Acs11, Cpt1a and Cpt1b in MC38 cells treated with indicated conditioned medium from JS-1 cells for 48 h by qPCR analysis (one-way ANOVA,  $n=3$  independent experiments) (E) and Western blot analysis (F).

Data are graphed as the mean  $\pm$  SD. ns, not significant,  $P > 0.05$ ; \* $P < 0.05$ ; \*\* $P < 0.01$ ; \*\*\* $P < 0.001$ .
