# Supplementary material for: Matrix Stiffness Triggers Lipid Metabolic Cross-talk between Tumor and Stromal Cells to Mediate Bevacizumab Resistance in Colorectal Cancer Liver Metastases
Source: PubMed Central journal article supplement — Cancer Res. 2023 Aug 23;83(21):3577–92. doi: 10.1158/0008-5472.CAN-23-0025 (PMC10618741; doi:10.1158/0008-5472.can-23-0025), 2023-08-23
Supplement: can-23-0025_figure_s4_suppsf4.pdf [file can-23-0025_figure_s4_suppsf4.pdf]

Supplementary Fig. S4

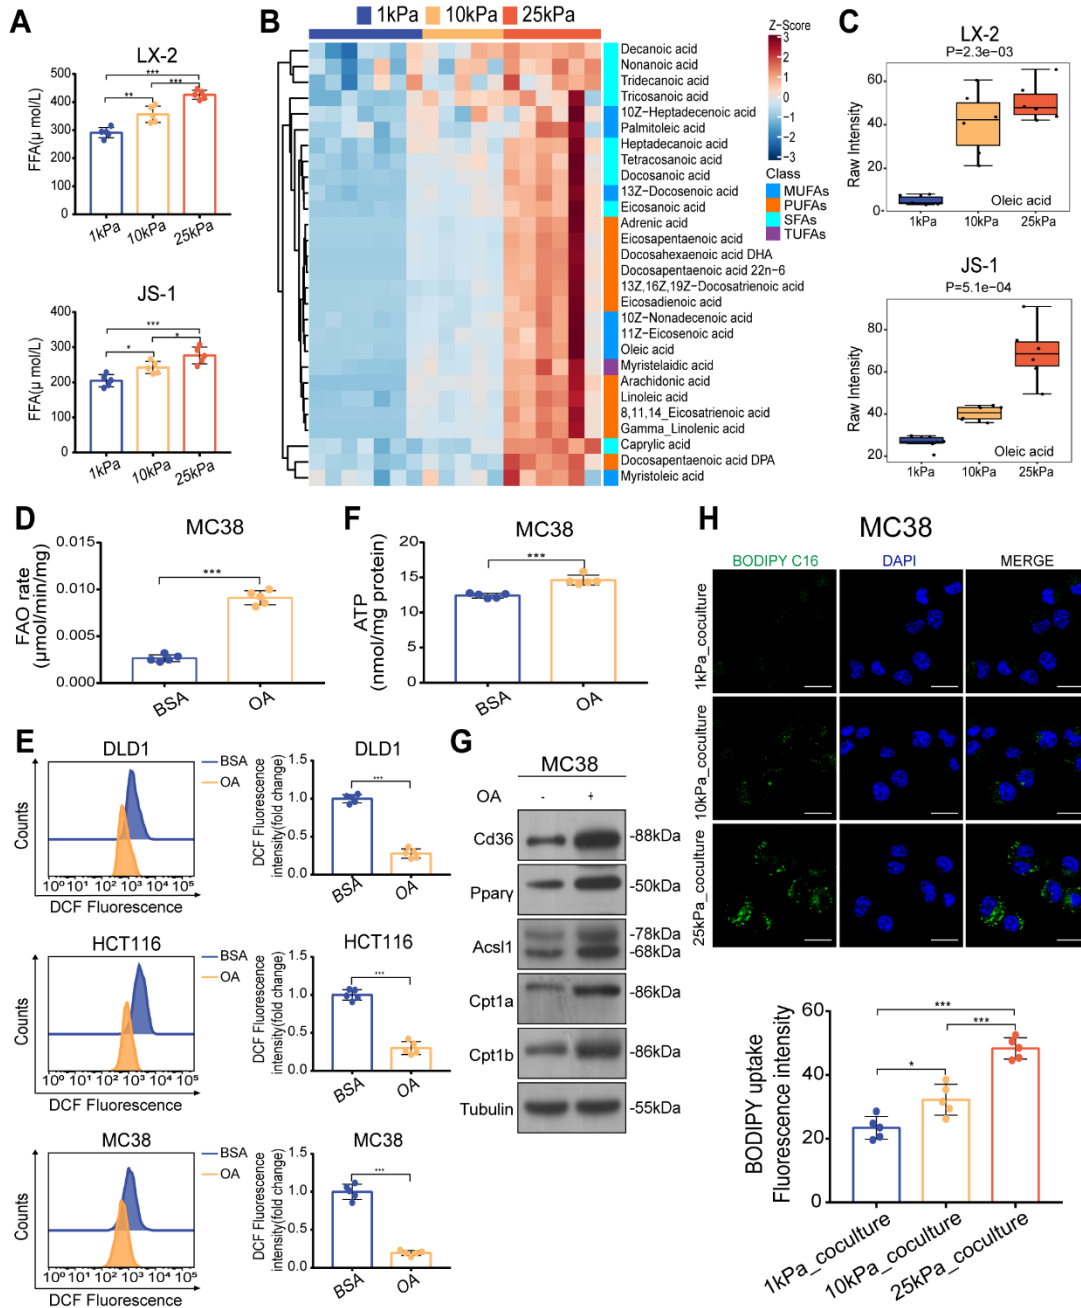

**Supplementary Figure. S4 High stiffness-induced HSCs promote FAO metabolism in colon cancer cells through secreting FFAs.** (A) FFA content in supernatant from LX-2 and JS-1 cells cultured on 1kPa, 10kPa and 25kPa polyacrylamide hydrogels (one-way ANOVA,  $n=5$  independent experiments). (B) Heatmap of targeted lipidomic profiling of medium-and-long-chain fatty acids species in supernatant derived from JS-1 cells cultured on 1kPa, 10kPa and 25kPa polyacrylamide hydrogels (Kruskal-Wallis test,  $n=6$  per group). (C) Raw intensity of oleic acid in supernatant derived from LX-2 and JS-1 cells cultured on 1kPa, 10kPa and 25kPa polyacrylamide hydrogels (Kruskal-Wallis test,  $n=6$  per group). (D) Fatty acid oxidation rate of MC38 cells treated with either BSA or oleic acid (two-tailed paired  $t$ -test,  $n=5$  independent experiments). (E) ROS content in DLD1, HCT116 and MC38 cells treated with

either BSA or oleic acid (OA, 100 $\mu$ M) (two-tailed paired *t*-test, n=5 independent experiments). **(F)** ATP level in of MC38 cells treated with either BSA or oleic acid (OA, 100 $\mu$ M) (two-tailed paired *t*-test, n=5 independent experiments). **(G)** Protein levels of Cd36, Ppar $\gamma$ , Acs11, Cpt1a and Cpt1b in MC38 cells treated with either BSA or oleic acid (OA, 100 $\mu$ M). **(H)** Representative images (upper) and quantification (lower) of labelled lipids in MC38 cells after co-culturing with JS-1 cells treated as indicated. Scale bar: 5 $\mu$ m (one-way ANOVA, n=5 independent experiments). Data are graphed as the mean  $\pm$  SD. \**P* < 0.05; \*\**P* < 0.01; \*\*\**P* < 0.001.
