# Supplementary material for: Matrix Stiffness Triggers Lipid Metabolic Cross-talk between Tumor and Stromal Cells to Mediate Bevacizumab Resistance in Colorectal Cancer Liver Metastases
Source: PubMed Central journal article supplement — Cancer Res. 2023 Aug 23;83(21):3577–92. doi: 10.1158/0008-5472.CAN-23-0025 (PMC10618741; doi:10.1158/0008-5472.can-23-0025), 2023-08-23
Supplement: can-23-0025_figure_s6_suppsf6.pdf [file can-23-0025_figure_s6_suppsf6.pdf]

Supplementary Fig. S6

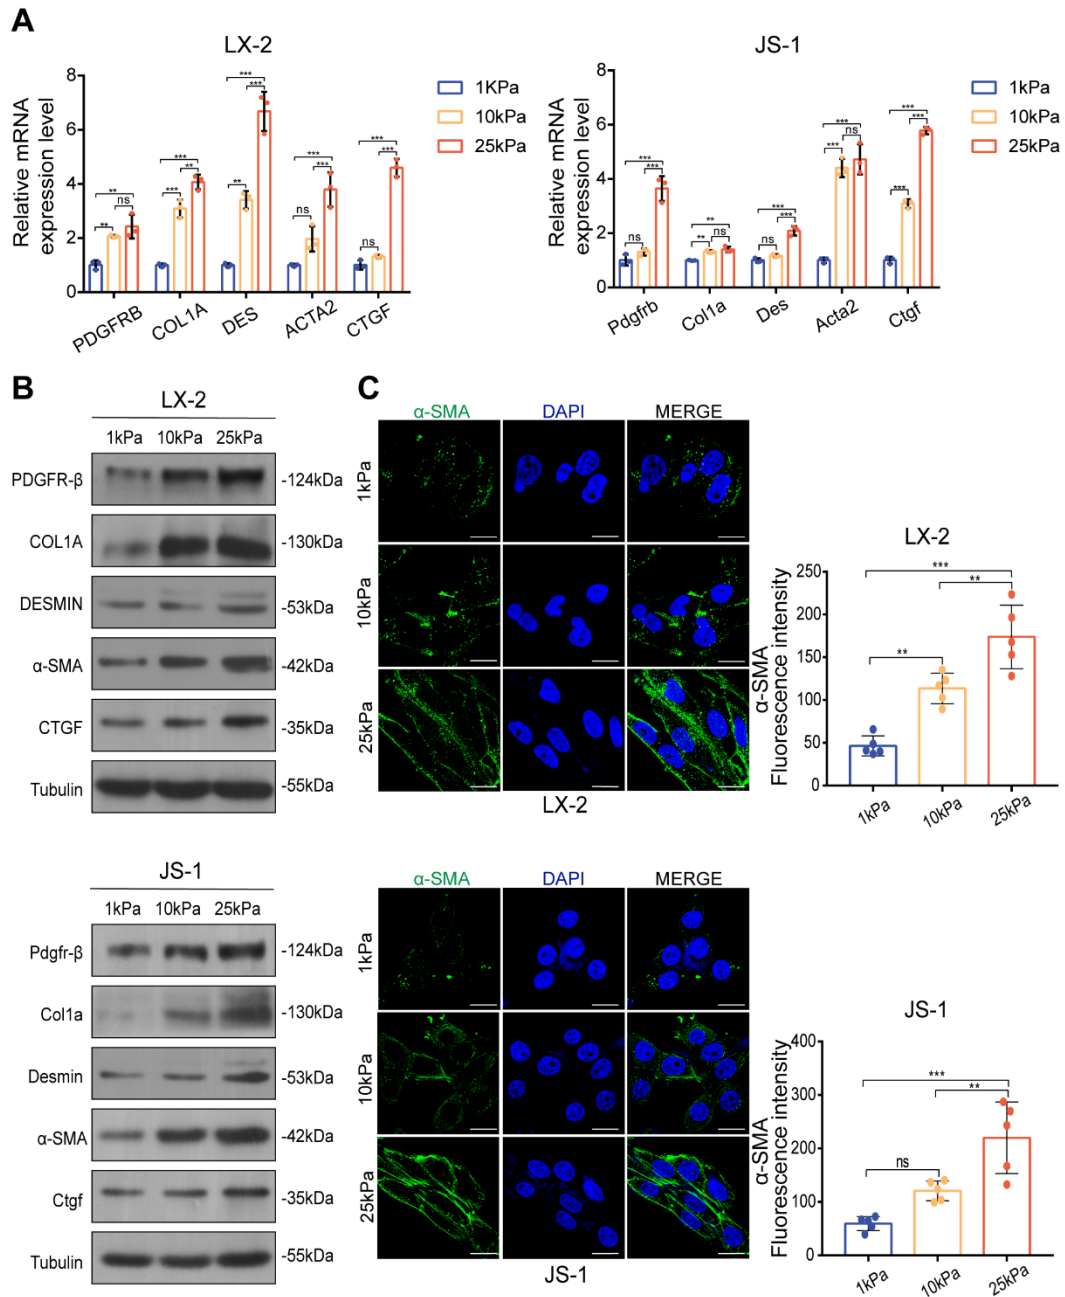

**Supplementary Figure. S6 Matrix stiffness induces HSC activation. (A)** Relative mRNA levels of *PDGFRB*, *COL1A*, *DES*, *ACTA2* and *CTGF* in LX-2 (left) and JS-1 cells (right) cultured on 1kPa, 10kPa and 25kPa polyacrylamide hydrogels (one-way ANOVA,  $n=3$  independent experiments). **(B).** Protein levels of PDGFR- $\beta$ , COL1A, DESMIN,  $\alpha$ -SMA and CTGF in LX-2 (upper) and JS-1 cells (lower) cultured on 1kPa, 10kPa and 25kPa polyacrylamide hydrogels. **(C)** Representative immunofluorescence images (left) and quantification (right) of LX-2 and JS-1 cells cultured on 1kPa, 10kPa and 25kPa polyacrylamide hydrogels show the presence of green-fluorescent  $\alpha$ -SMA expression (one-way ANOVA,  $n=5$  independent experiments). Data are graphed as the mean  $\pm$  SD. ns, not significant,  $p>0.05$ ; \* $P<0.05$ ; \*\* $P<0.01$ ; \*\*\* $P<0.001$ .
