# Supplementary material for: Matrix Stiffness Triggers Lipid Metabolic Cross-talk between Tumor and Stromal Cells to Mediate Bevacizumab Resistance in Colorectal Cancer Liver Metastases
Source: PubMed Central journal article supplement — Cancer Res. 2023 Aug 23;83(21):3577–92. doi: 10.1158/0008-5472.CAN-23-0025 (PMC10618741; doi:10.1158/0008-5472.can-23-0025), 2023-08-23
Supplement: can-23-0025_figure_s7_suppsf7.pdf [file can-23-0025_figure_s7_suppsf7.pdf]

Supplementary Fig. S7

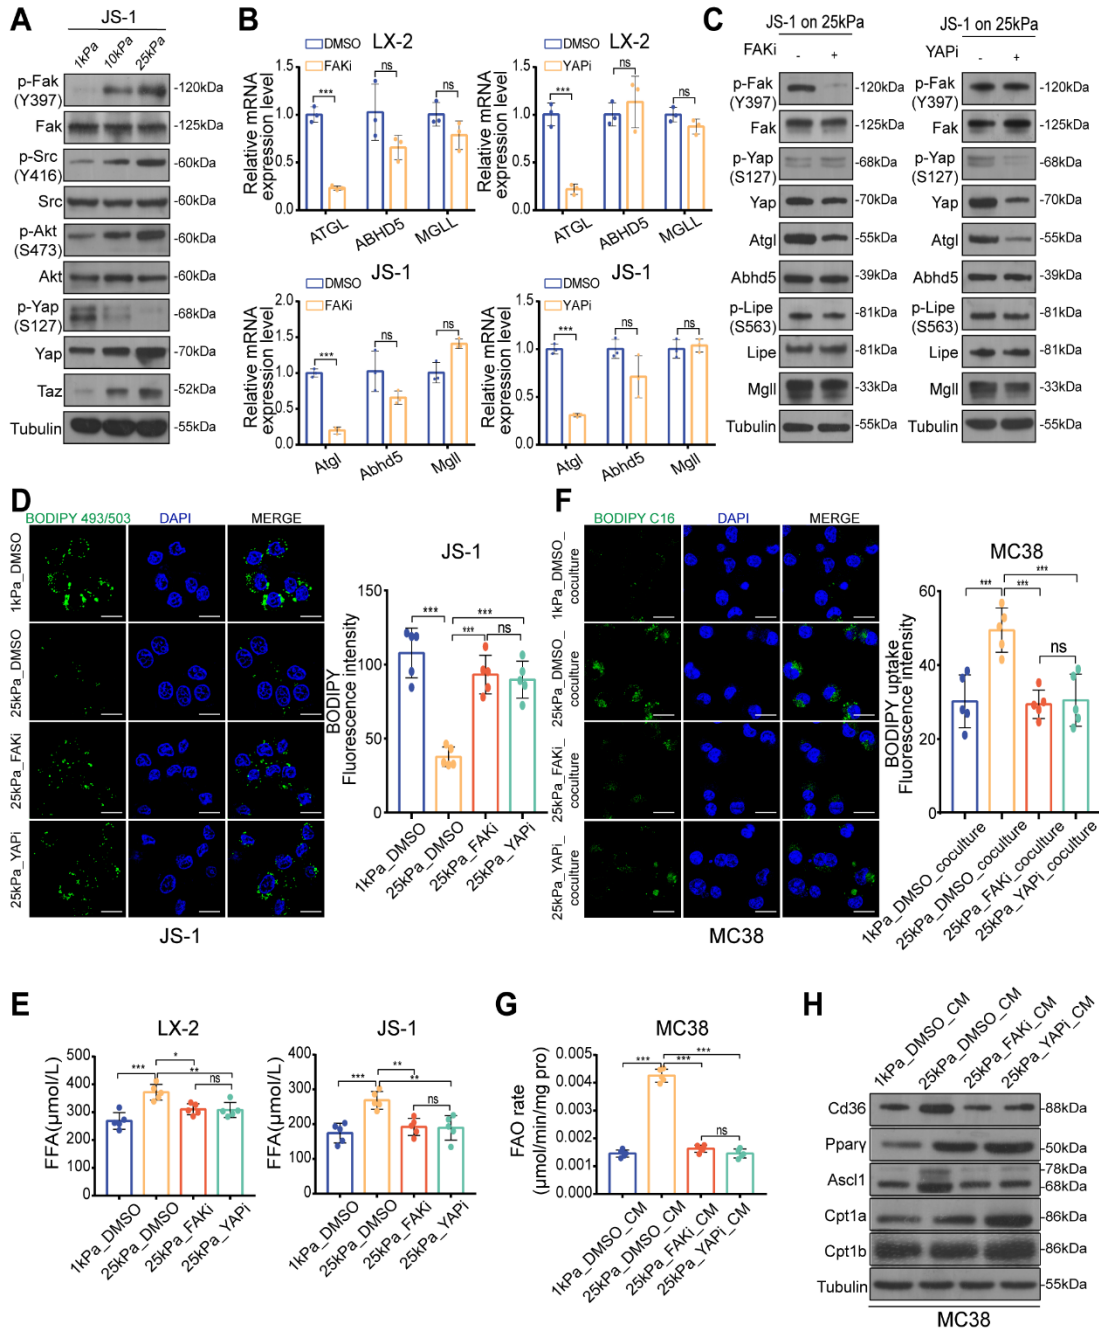

**Supplementary Figure. S7 Matrix stiffness induces lipolysis in HSCs via activating the FAK-YAP signaling pathway. (A)** Protein levels of total Fak, phosphorylated Fak, total Src, phosphorylated Src, total Akt, phosphorylated Akt, total Yap, phosphorylated Yap, and Taz in JS-1 cells cultured on 1kPa, 10kPa and 25kPa polyacrylamide hydrogels. **(B)** Relative mRNA levels of lipolysis related genes in LX-2 and JS-1 cells cultured on 25kPa polyacrylamide hydrogels treated with DMSO, 10 $\mu$ M FAK inhibitor (FAKi) PF-573228 or 0.1 $\mu$ M YAP inhibitor verteporfin (YAPi) for 24 h (Student's *t*-test, *n*=3 independent experiments). **(C)** Protein levels of total Fak, phosphorylated Fak, total Yap, phosphorylated Yap, Atgl, Abhd5, total Lipe, phosphorylated Lipe and Mgl1 protein levels in JS-1 cells treated as indicated. **(D)** Representative images (left) and quantification (right) of lipid level in JS-1 cells with indicated

treatment. Scale bar: 5 $\mu$ m (one-way ANOVA, n=5 independent experiments). **(E)** FFA content in supernatant from LX-2 and JS-1 cells with indicated treatment (one-way ANOVA, n=5 independent experiments). **(F)** Representative images (left) and quantification (right) of labelled lipids in MC38 cells after co-culturing with JS-1 cells treated as indicated. Scale bar: 5 $\mu$ m (one-way ANOVA, n=5 independent experiments). **(G)** Fatty acid oxidation rate of MC38 cells treated with indicated conditioned medium (one-way ANOVA, n=5 independent experiments). **(H)** Protein levels of Cd36, Ppar $\gamma$ , Acs11, Cpt1a and Cpt1b in MC38 cells treated with indicated conditioned medium from JS-1 cells. Data are graphed as the mean  $\pm$  SD. ns, not significant,  $P > 0.05$ ; \* $P < 0.05$ ; \*\* $P < 0.01$ ; \*\*\* $P < 0.001$ .
